# Supplementary material
Source: Springer Nature journal article supplement (https://www.springermedizin.de/resource/supplementary/12888_2013_1859_MOESM4_ESM.pdf/9480348)
Supplement: MOESM4 [file 9480348]

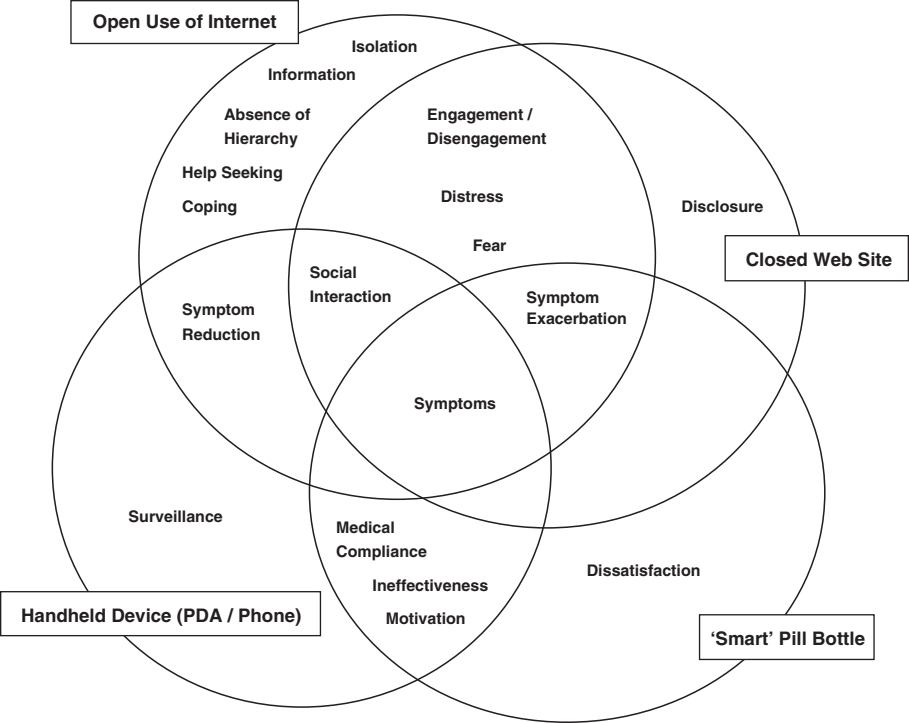

**Open Use of Internet**

**Isolation**

**Information**

**Absence of  
Hierarchy**

**Help Seeking**

**Coping**

**Engagement /  
Disengagement**

**Distress**

**Fear**

**Disclosure**

**Closed Web Site**

**Social  
Interaction**

**Symptom  
Reduction**

**Symptom  
Exacerbation**

**Symptoms**

**Surveillance**

**Medical  
Compliance**

**Ineffectiveness**

**Motivation**

**Dissatisfaction**

**Handheld Device (PDA / Phone)**

**'Smart' Pill Bottle**
